# Supplementary material
Source: PubMed Central journal article supplement (PMC7954938)
Supplement: NIHMS1663028-supplement-Sup_Fig_1.pdf [file NIHMS1663028-supplement-Sup_Fig_1.pdf]

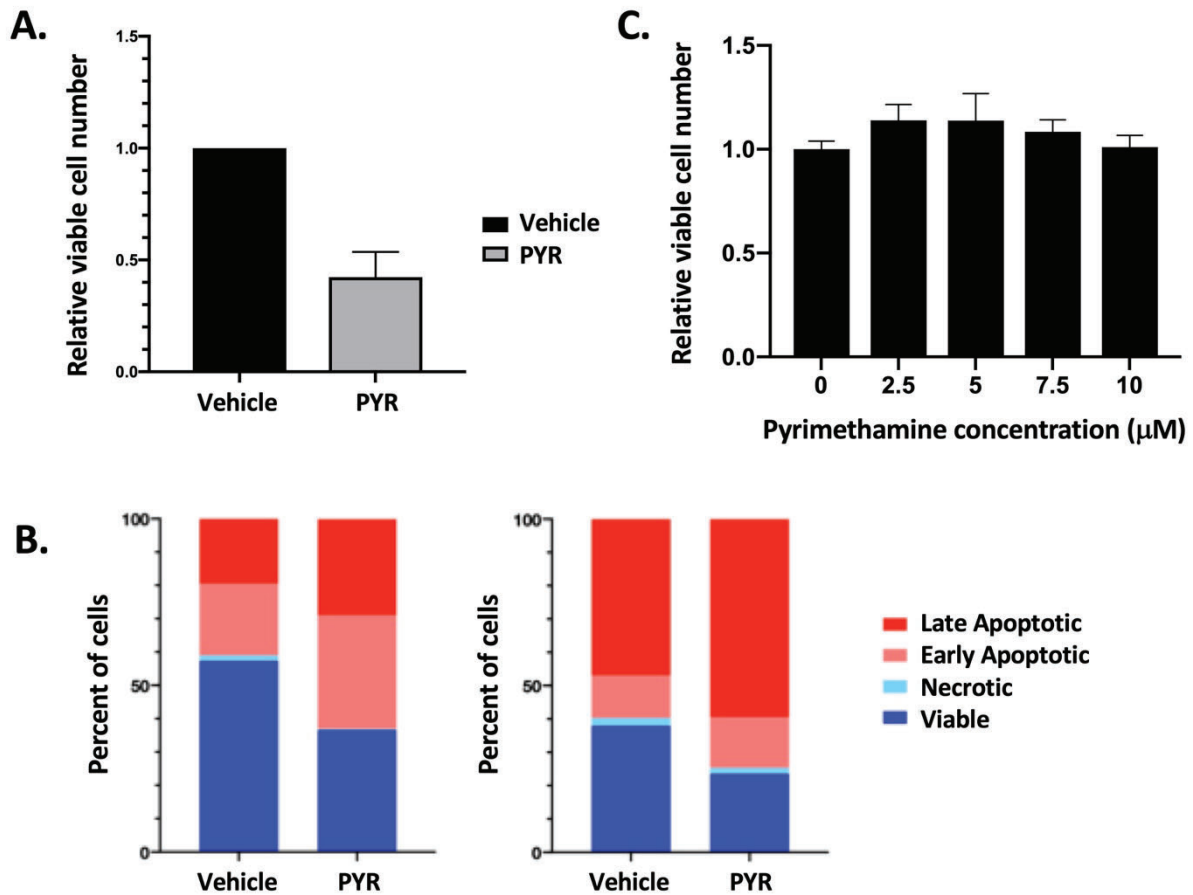

**Supplementary Figure 1.** Pyrimethamine selectively decreases survival and induces apoptosis in CLL cells *in vitro*. (A) Pyrimethamine decreases viable cell number of primary CLL cells *in vitro*. Cells were treated with 10 μM pyrimethamine or vehicle for 48 hours, and relative viable cell number was determined by ATP-dependent bioluminescence. Representative of 12 CLL patient samples. (B) Pyrimethamine induces apoptosis in CLL cells *in vitro*. CLL cells from two different patients were treated with 10 μM pyrimethamine or vehicle for 24 hours, after which cells were stained with annexin V and PI, and analyzed by flow cytometry. Early apoptotic cells, annexin V+/PI-; late apoptotic cells, annexin V+, PI+; necrotic cells, annexin V-, PI+; and, viable cells, annexin V-, PI-. (C) PBMC from a healthy donor were treated with the indicated dose of pyrimethamine for 48 hours, after which relative viable cell number was determined by the same method. Representative of samples from 6 healthy donors.
