# Supplementary material
Source: PubMed Central journal article supplement (PMC7954938)
Supplement: NIHMS1663028-supplement-Sup_Fig_2.pdf [file NIHMS1663028-supplement-Sup_Fig_2.pdf]

**A.**

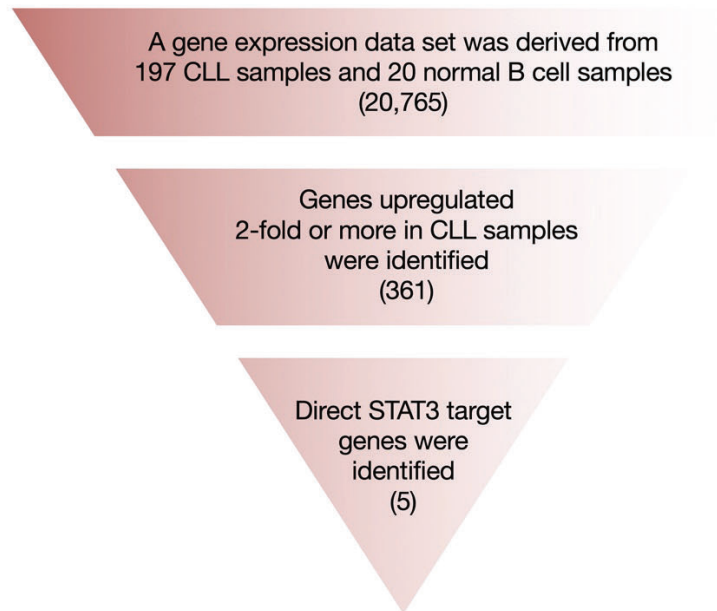

**B.**

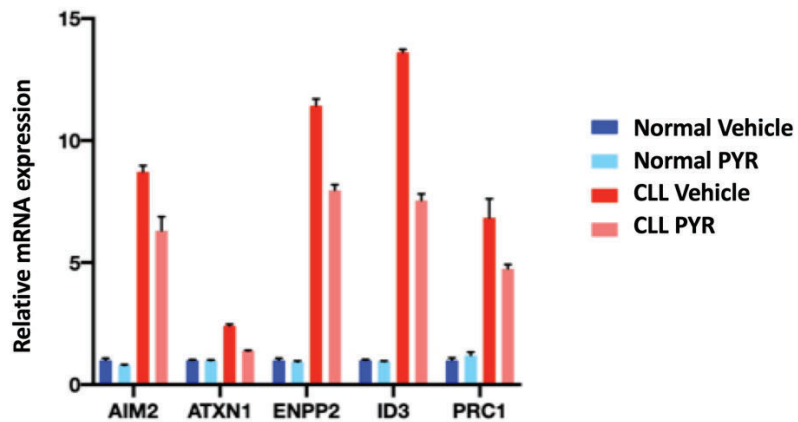

**Supplementary Figure 2. Identification of a STAT3 gene expression signature in CLL.** (A) Direct STAT3 target genes in CLL cells were determined by identifying genes whose expression was elevated  $\geq 2$ -fold in CLL cells compared to normal B lymphocytes, and showed direct STAT3 binding or regulation. (B) The five genes in the CLL STAT3 signature show increased expression in CLL cells compared to PBMCs from healthy donors, and downregulation by pyrimethamine treatment (10  $\mu$ M for 24 hours) *in vitro*.
