# Supplementary material
Source: PubMed Central journal article supplement (PMC7954938)
Supplement: NIHMS1663028-supplement-Sup_Fig_3.pdf [file NIHMS1663028-supplement-Sup_Fig_3.pdf]

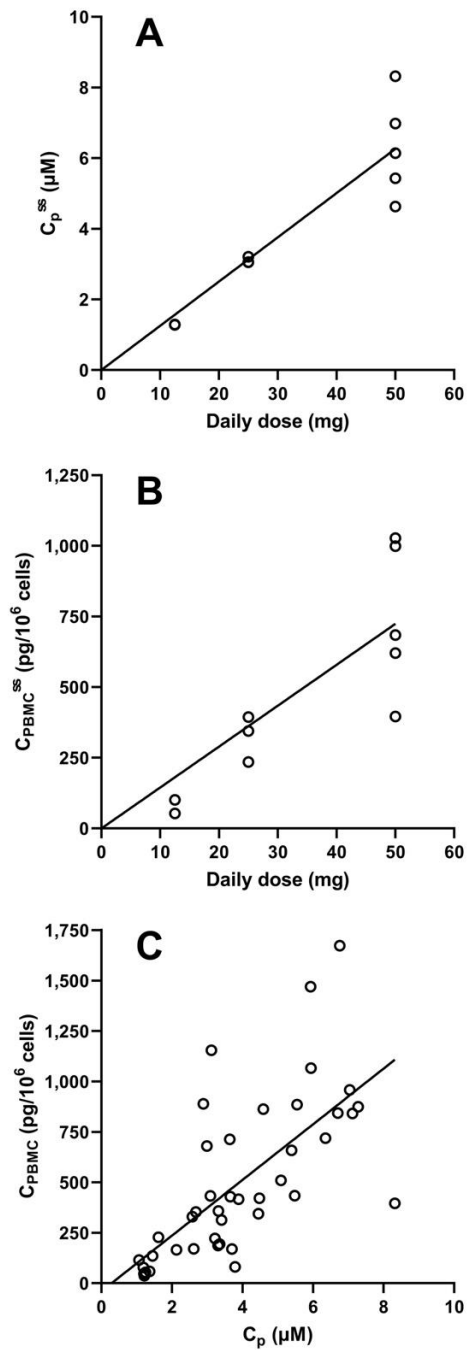

**Supplementary Figure 3.** Pyrimethamine pharmacokinetics. Steady state concentration of pyrimethamine in plasma (A) and PBMCs (B) for individual patients at each dose level. (C) Correlation between the concentration of pyrimethamine in plasma and PBMCs isolated from the same blood sample for all evaluable samples collected during steady state ( $r = 0.681$ ).
