# Supplementary material
Source: PubMed Central journal article supplement (PMC7954938)
Supplement: NIHMS1663028-supplement-Sup_Fig_5.pdf [file NIHMS1663028-supplement-Sup_Fig_5.pdf]

Overall survival

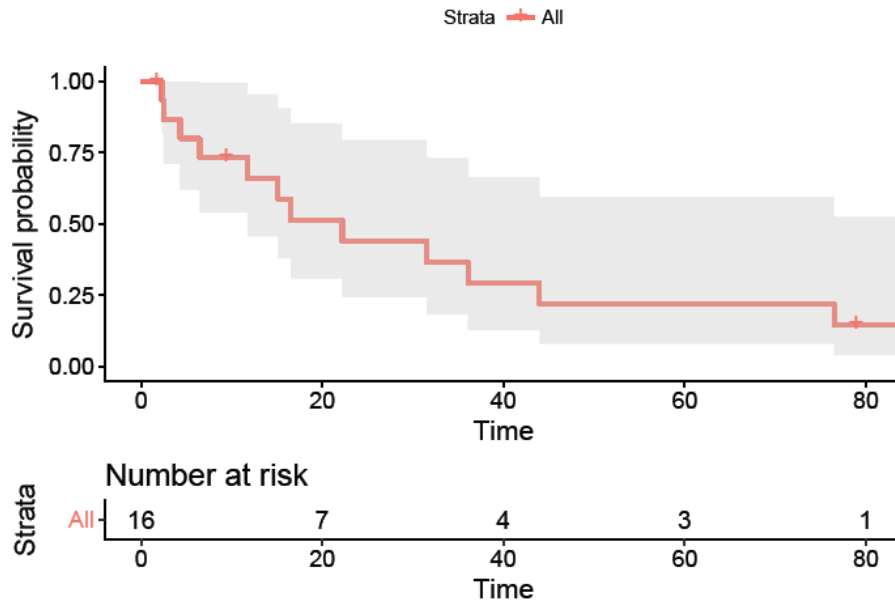

Median overall survival is 22.19 months, CI: (11.75,NA) Upper bound for the confidence interval is NA, likely due to small sample size.

Supplementary Figure 5. Overall Survival For All Patients.
