# Supplementary material
Source: PubMed Central journal article supplement (PMC7954938)
Supplement: NIHMS1663028-supplement-Sup_Fig_7.pdf [file NIHMS1663028-supplement-Sup_Fig_7.pdf]

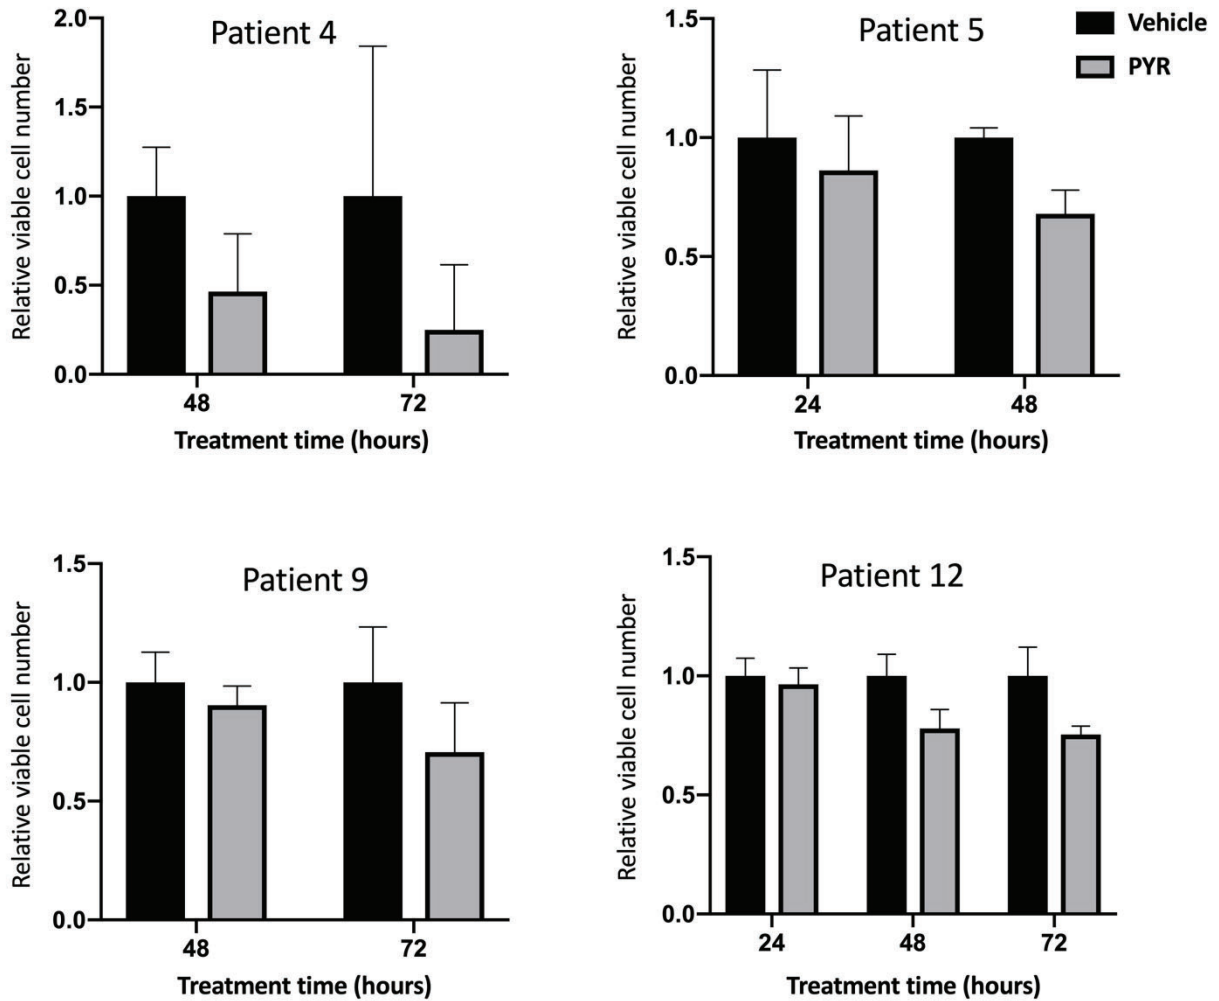

**Supplementary Figure 7.** Sensitivity of pre-treatment patient samples treated with pyrimethamine *ex vivo*. Samples from the peripheral blood of the indicated patients were treated with vehicle or 10  $\mu$ M pyrimethamine for the time period specified, after which viable cell number was determined.
