# Supplementary material
Source: PubMed Central journal article supplement (PMC7954938)
Supplement: NIHMS1663028-supplement-Sup_Fig_8.pdf [file NIHMS1663028-supplement-Sup_Fig_8.pdf]

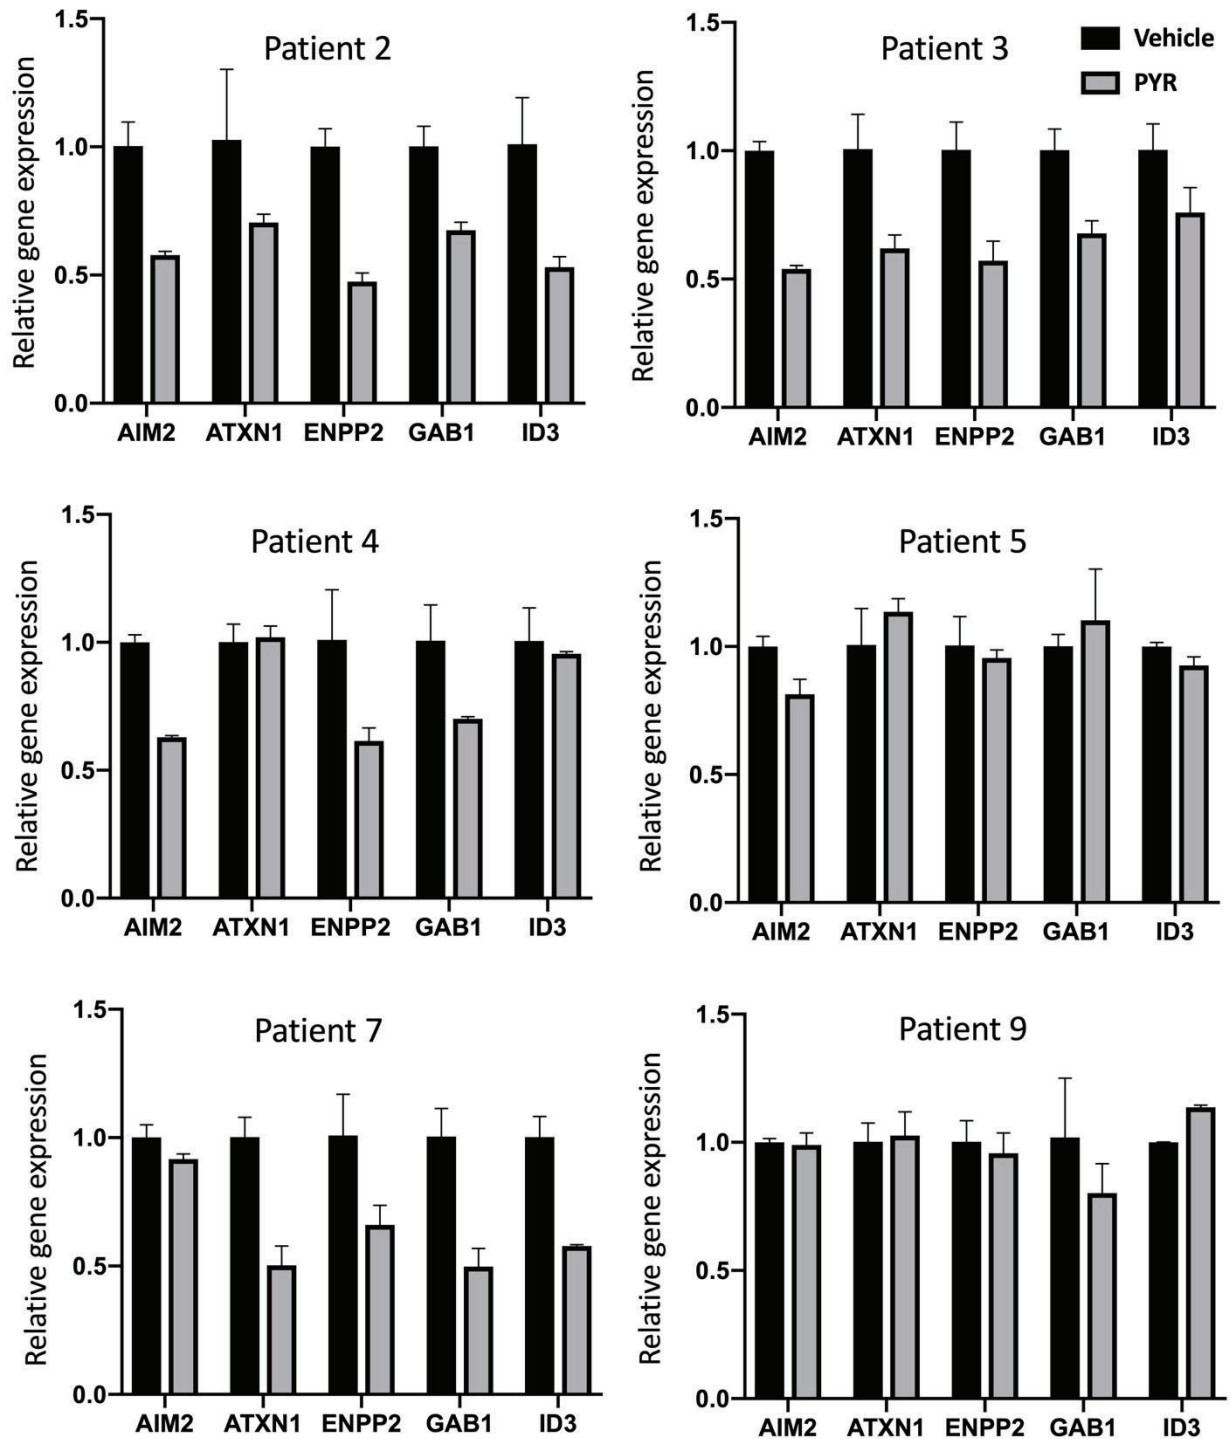

**Supplemental Figure 8.** Changes in expression of STAT3 target genes in pre-treatment patient samples treated with pyrimethamine *ex vivo*. Cells were treated with vehicle or 10  $\mu$ M pyrimethamine for 24 hours, after which RNA was harvested and the indicated genes were quantitated by RT-PCR.
