# Supplementary material
Source: PubMed Central journal article supplement (PMC7954938)
Supplement: NIHMS1663028-supplement-Sup_Table_1.pdf [file NIHMS1663028-supplement-Sup_Table_1.pdf]

**Supplemental Table 1: Patient Characteristics**

| <b>N = 16</b>                                     | <b>N (range or %)</b>   |
|---------------------------------------------------|-------------------------|
| Age at Study Entry                                | 63 (36-85)              |
| Sex - Male                                        | 11 (69)                 |
| Rai Stage 3-4                                     | 4 (25)                  |
| Median WBC at baseline, 10 <sup>3</sup> /μL       | 11 (2 - 94.9)           |
| Median Hb at baseline, g/dL                       | 10 (7.6 - 15)           |
| Median platelets at baseline, 10 <sup>3</sup> /μL | 113 (6 - 217)           |
| Median β2m, mg/L                                  | 5 (3 - 16.5)            |
| ECOG 0 / 1 / 2                                    | 3(19)/ 10(62)/ 2(13)    |
|                                                   |                         |
| Time from diagnosis to Study Therapy              | 74 months (6-176)       |
| Number of Prior Therapies                         | 6 (1-16)                |
| <i>IGHV</i> Unmutated                             | 11 / 14 evaluable (79%) |
| ZAP-70 Positive (>20%)                            | 8 / 9 evaluable (89%)   |
| Interphase FISH (Dohner hierarchy)                |                         |
| Del 17p                                           | 6 (38%)                 |
| Del 11q                                           | 3 (19%)                 |
| Trisomy 12                                        | 4 (25%)                 |
| Normal                                            | 2 (13%)                 |
| Del 13q                                           | 1 (6%)                  |
| Most common prior therapies                       |                         |
| Fludarabine rituximab +/- cyclophosphamide        | 15                      |
| High dose methylprednisolone +/- antibody         | 8                       |
| Rituximab                                         | 6                       |
| Bendamustine +/- R                                | 6                       |
| Involved field radiation                          | 6                       |
| Alemtuzumab                                       | 5                       |
| CHOP +/- R                                        | 5                       |
| CVP +/- R                                         | 4                       |
| Chlorambucil or cyclophosphamide                  | 4                       |
| Ofatumumab                                        | 3                       |
| Lenalidomide                                      | 3                       |
| PI3K inhibitor                                    | 1                       |
| BTK inhibitor                                     | 0                       |
|                                                   |                         |
