# Supplementary material
Source: PubMed Central journal article supplement (PMC7954938)
Supplement: NIHMS1663028-supplement-Sup_Table_2.pdf [file NIHMS1663028-supplement-Sup_Table_2.pdf]

**Supplementary Table 2: Adverse Events Occurring in at Least Two Patients, by Dose Level**

| Toxicity grade:                                           | Dose Level 1 |   |   |   | Dose Level 2 |   |   |   | Dose Level 3 |   |   |   | Total on all Dose Levels |   |   |   | Total |
|-----------------------------------------------------------|--------------|---|---|---|--------------|---|---|---|--------------|---|---|---|--------------------------|---|---|---|-------|
|                                                           | 1            | 2 | 3 | 4 | 1            | 2 | 3 | 4 | 1            | 2 | 3 | 4 | 1                        | 2 | 3 | 4 |       |
| <b>Toxicity:</b>                                          |              |   |   |   |              |   |   |   |              |   |   |   |                          |   |   |   |       |
| Anemia                                                    | 1            | 2 | 0 | 0 | 0            | 1 | 1 | 0 | 5            | 4 | 0 | 0 | 6                        | 7 | 1 | 0 | 14    |
| Platelet count decreased                                  | 2            | 0 | 0 | 1 | 1            | 1 | 0 | 1 | 2            | 2 | 2 | 1 | 5                        | 3 | 2 | 3 | 13    |
| Creatinine increased                                      | 3            | 0 | 0 | 0 | 1            | 2 | 0 | 0 | 3            | 2 | 0 | 0 | 7                        | 4 | 0 | 0 | 11    |
| Hyperglycemia                                             | 0            | 1 | 0 | 0 | 2            | 1 | 0 | 0 | 5            | 1 | 0 | 0 | 7                        | 3 | 0 | 0 | 10    |
| Fatigue                                                   | 1            | 0 | 0 | 0 | 1            | 1 | 0 | 0 | 4            | 1 | 0 | 0 | 6                        | 2 | 0 | 0 | 8     |
| Hypocalcemia                                              | 0            | 0 | 0 | 0 | 1            | 1 | 0 | 0 | 6            | 0 | 0 | 0 | 7                        | 1 | 0 | 0 | 8     |
| Dyspnea                                                   | 2            | 0 | 0 | 0 | 1            | 0 | 0 | 0 | 2            | 2 | 0 | 0 | 5                        | 2 | 0 | 0 | 7     |
| Aspartate aminotransferase increased                      | 1            | 0 | 0 | 0 | 1            | 0 | 0 | 0 | 4            | 0 | 0 | 0 | 6                        | 0 | 0 | 0 | 6     |
| Neutrophil count decreased                                | 0            | 1 | 0 | 0 | 0            | 0 | 1 | 1 | 0            | 1 | 3 | 0 | 0                        | 2 | 4 | 0 | 6     |
| Alkaline phosphatase increased                            | 0            | 1 | 0 | 0 | 1            | 1 | 0 | 0 | 1            | 0 | 0 | 0 | 2                        | 2 | 0 | 0 | 4     |
| Anorexia                                                  | 3            | 0 | 0 | 0 | 0            | 0 | 0 | 0 | 1            | 0 | 0 | 0 | 4                        | 0 | 0 | 0 | 4     |
| Cough                                                     | 1            | 0 | 0 | 0 | 3            | 0 | 0 | 0 | 0            | 0 | 0 | 0 | 4                        | 0 | 0 | 0 | 4     |
| Edema limbs                                               | 0            | 0 | 0 | 0 | 1            | 0 | 0 | 0 | 2            | 0 | 0 | 0 | 3                        | 0 | 0 | 0 | 3     |
| Lung infection                                            | 0            | 0 | 0 | 0 | 0            | 1 | 0 | 0 | 1            | 1 | 0 | 0 | 1                        | 2 | 0 | 0 | 3     |
| Alanine aminotransferase increased                        | 0            | 1 | 0 | 0 | 1            | 0 | 0 | 0 | 1            | 0 | 0 | 0 | 2                        | 1 | 0 | 0 | 3     |
| Blood bilirubin increased                                 | 1            | 0 | 0 | 0 | 0            | 0 | 0 | 0 | 2            | 0 | 0 | 0 | 3                        | 0 | 0 | 0 | 3     |
| Hypercalcemia                                             | 1            | 0 | 0 | 0 | 1            | 0 | 0 | 0 | 1            | 0 | 0 | 0 | 3                        | 0 | 0 | 0 | 3     |
| Hyperuricemia                                             | 0            | 0 | 0 | 0 | 1            | 0 | 0 | 0 | 1            | 0 | 1 | 0 | 2                        | 0 | 1 | 0 | 3     |
| Hypomagnesemia                                            | 0            | 0 | 0 | 0 | 0            | 0 | 0 | 0 | 3            | 0 | 0 | 0 | 3                        | 0 | 0 | 0 | 3     |
| Hypophosphatemia                                          | 0            | 0 | 0 | 0 | 0            | 1 | 0 | 0 | 0            | 2 | 0 | 0 | 0                        | 3 | 0 | 0 | 3     |
| General disorders & administration site conditions, other | 0            | 0 | 0 | 0 | 1            | 0 | 0 | 0 | 1            | 0 | 0 | 0 | 2                        | 0 | 0 | 0 | 2     |
| Erythema multiforme                                       | 1            | 0 | 0 | 0 | 1            | 0 | 0 | 0 | 0            | 0 | 0 | 0 | 2                        | 0 | 0 | 0 | 2     |
| Rash acneiform                                            | 0            | 0 | 0 | 0 | 0            | 0 | 0 | 0 | 1            | 1 | 0 | 0 | 1                        | 1 | 0 | 0 | 2     |
| Skin and subcutaneous tissue disorders, other             | 0            | 0 | 0 | 0 | 1            | 0 | 0 | 0 | 1            | 0 | 0 | 0 | 2                        | 0 | 0 | 0 | 2     |
| Diarrhea                                                  | 0            | 0 | 0 | 0 | 1            | 0 | 0 | 0 | 1            | 0 | 0 | 0 | 2                        | 0 | 0 | 0 | 2     |
| Nausea                                                    | 1            | 0 | 0 | 0 | 1            | 0 | 0 | 0 | 0            | 0 | 0 | 0 | 2                        | 0 | 0 | 0 | 2     |

|                               |   |   |   |   |   |   |   |   |   |   |   |   |   |   |   |   |   |
|-------------------------------|---|---|---|---|---|---|---|---|---|---|---|---|---|---|---|---|---|
| White blood cell decreased    | 0 | 0 | 0 | 0 | 0 | 0 | 1 | 0 | 0 | 0 | 1 | 0 | 0 | 0 | 2 | 0 | 2 |
| Alkalosis                     | 0 | 0 | 0 | 0 | 1 | 0 | 0 | 0 | 1 | 0 | 0 | 0 | 2 | 0 | 0 | 0 | 2 |
| Hyperkalemia                  | 1 | 0 | 0 | 0 | 0 | 0 | 0 | 0 | 1 | 0 | 0 | 0 | 2 | 0 | 0 | 0 | 2 |
| Hyponatremia                  | 1 | 0 | 0 | 0 | 1 | 0 | 0 | 0 | 0 | 0 | 0 | 0 | 2 | 0 | 0 | 0 | 2 |
| Peripheral sensory neuropathy | 0 | 0 | 0 | 0 | 1 | 0 | 0 | 0 | 1 | 0 | 0 | 0 | 2 | 0 | 0 | 0 | 2 |
| Acute kidney injury           | 0 | 0 | 0 | 0 | 0 | 0 | 0 | 0 | 1 | 1 | 0 | 0 | 1 | 1 | 0 | 0 | 2 |
