# Supplementary material
Source: PubMed Central journal article supplement (PMC7954938)
Supplement: NIHMS1663028-supplement-Sup_Table_3.pdf [file NIHMS1663028-supplement-Sup_Table_3.pdf]

**Supplementary Table 3. Mean steady state concentration of pyrimethamine in plasma and PBMCs.**

| Dose<br>(mg/day) | No. of<br>patients | Pyrimethamine concentration |                             |
|------------------|--------------------|-----------------------------|-----------------------------|
|                  |                    | Plasma<br>( $\mu$ M)        | PBMCs<br>(pg/ $10^6$ cells) |
| 12.5             | 2                  | 1.28<br>(1.0)               | 73.2<br>(47.6)              |
| 25.0             | 3                  | 3.27<br>(7.8)               | 317.3<br>(27.3)             |
| 50.0             | 5                  | 6.17<br>(22.8)              | 703.8<br>(40.7)             |

Values presented as geometric mean (geometric %CV)
