# Supplementary material
Source: PubMed Central journal article supplement (PMC7954938)

Progression free survival

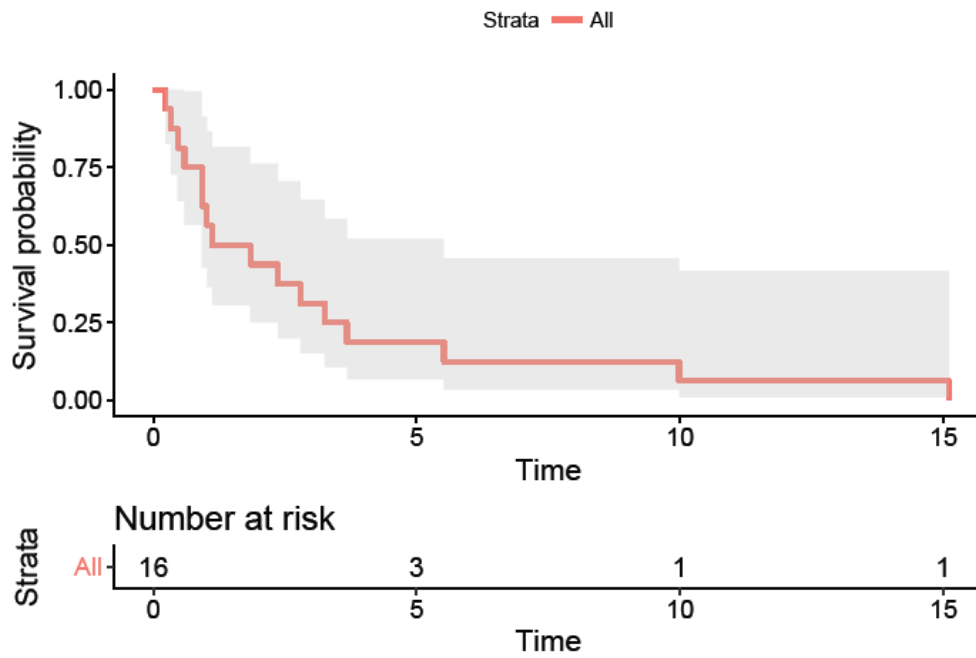

Supplementary Figure 4. Progression-Free Survival For All Patients

Supplement: NIHMS1663028-supplement-Sup_Fig_4.pdf [file NIHMS1663028-supplement-Sup_Fig_4.pdf]
